# Supplementary material for: Ionic liquids containing fluorinated β-diketonate anions: synthesis, characterization and potential applications
Source: Royal Society of Chemistry journal article supplement (doi:10.1039/c3nj40855h), 2013-01-01
Supplement: c3nj40855h.pdf [file c3nj40855h.pdf]

This journal is © The Royal Society of Chemistry 2013

## ELECTRONIC SUPPLEMENTARY INFORMATION (ESI)

# Ionic liquids containing fluorinated $\beta$ -diketonate anions: synthesis, characterization and potential applications

Shubha Pandey,<sup>a,b</sup> Gary A. Baker,<sup>b</sup> Leonhard Sze,<sup>a</sup> Siddharth Pandey,<sup>b</sup> Ganesh Kamath,<sup>b</sup> Hua Zhao,<sup>c</sup> and Sheila N. Baker<sup>a\*</sup>

<sup>a</sup>Department of Chemical Engineering, University of Missouri-Columbia, Columbia, MO 65211.

<sup>b</sup>Department of Chemistry, University of Missouri-Columbia, Columbia, MO 65211.

<sup>c</sup>Chemistry Program, Savannah State University, Savannah, GA 31404.

\* Corresponding author. E-mail: bakershei@missouri.edu

### Force field development

Non-bonded interactions are described by a pairwise-additive Lennard–Jones (12-6) plus point charge functional form. The [choline]<sup>+</sup> cation was modeled based on the force field parameters developed by Morrow and Maginn.<sup>[1]</sup> However no force field parameters are available in the literature for the  $\beta$ -diketone anions such as [hfac]<sup>-</sup>. The Lennard-Jones (L-J) parameters for the different functional groups in [hfac]<sup>-</sup> were transferred from analogous groups previously modeled in OPLS-AA and AMBER. While the bonded parameters for [choline]<sup>+</sup> cation were obtained from the force field of Morrow and Maginn, the bonded parameters between the different interaction sites in the anion were based on the AMBER harmonic bond stretching and angle bending potential. The dihedral parameters for the different angles were fit to reproduce the energetics of conformational scan obtained from HF/6-31+g(d,p) using Gaussian 09,<sup>[2]</sup> as shown in Fig. S1. The point charges for the different functional group in [hfac]<sup>-</sup> anion were obtained from CHELPG population analysis on an optimized [choline][hfac] geometry performed at the HF level of theory and 6-31+g(d,p) basis set.

The CO<sub>2</sub> molecule was modeled using the three site model developed by Potoff et al.<sup>[3]</sup> The LJ and partial charges for CO<sub>2</sub> were optimized based on reproduction of vapor liquid coexistence curves and the quadrupole moment of CO<sub>2</sub>. Partial point charges were centered at each LJ site with an equilibrium C–O bond length of 1.16 Å, and equilibrium O–C–O bond angle of 180° with harmonic potentials governing the conformational dynamics. The Hamiltonian ( $V_{total}$ ) of the system is given by equation 1.

$$V_{Total} = K_b (b - b_o)^2 + K_\theta (\theta - \theta_o)^2 + K_\chi [1 + \cos(n\chi - \delta)] + \varepsilon_{i,j} \left[ \left( \frac{R_{min\ i,j}}{r_{i,j}} \right)^{12} - 2 \left( \frac{R_{min\ i,j}}{r_{i,j}} \right)^6 \right] + \frac{q_i q_j}{r_{i,j}} \quad (1)$$

This journal is © The Royal Society of Chemistry 2013

A list of the non-bonded and bonded parameters for the [hfac]<sup>-</sup> anion can be found in **Table S1** and **Table S2** respectively.

**Table S1.** Non-bonded force field parameters and partial charges for the interaction sites within the [hfac]<sup>-</sup> anion.

| site                           | $\epsilon$ (kcal/mol) | $R_{\min}$ (Å) | Partial charge $q$ (e) |
|--------------------------------|-----------------------|----------------|------------------------|
| C                              | -0.0200               | 2.300          | 0.53                   |
| F                              | -0.0970               | 1.600          | -0.25                  |
| C <sub>2</sub> /C <sub>3</sub> | -0.1027               | 2.106          | 0.75                   |
| C <sub>4</sub>                 | -0.0560               | 2.010          | -0.82                  |
| O                              | -0.2079               | 1.666          | -0.67                  |
| H                              | -0.0560               | 2.010          | 0.10                   |

This journal is © The Royal Society of Chemistry 2013

**Table S2.** Bonded force field parameters comprising of harmonic bond stretching, bond angle and torsional cosine series functional form for [hfac]<sup>-</sup> anion.

| <b>Bond</b>                                                     | $k_b$<br>(kcal/mol)      | $b_0$<br>(Å)               |                       |
|-----------------------------------------------------------------|--------------------------|----------------------------|-----------------------|
| C-F                                                             | 441.9                    | 1.323                      |                       |
| C-C <sub>2</sub> / C-C <sub>3</sub>                             | 250.0                    | 1.520                      |                       |
| C <sub>2</sub> -C <sub>4</sub> / C <sub>3</sub> -C <sub>4</sub> | 222.50                   | 1.534                      |                       |
| C <sub>2</sub> -O/ C <sub>3</sub> -O                            | 700.00                   | 1.215                      |                       |
| C <sub>4</sub> -H                                               | 309.00                   | 1.111                      |                       |
| <b>Angle</b>                                                    | $K_\theta$<br>(kcal/mol) | $\theta_0$<br>(degrees)    |                       |
| F-C-C <sub>2</sub> /C <sub>3</sub>                              | 44.0                     | 112.0                      |                       |
| F-C-F                                                           | 93.3                     | 107.1                      |                       |
| C-C <sub>2</sub> -O                                             | 75.0                     | 122.0                      |                       |
| C <sub>2</sub> -C <sub>4</sub> -H                               | 50.0                     | 109.5                      |                       |
| O-C <sub>2</sub> -C <sub>4</sub>                                | 75.0                     | 122.0                      |                       |
| C <sub>2</sub> -C <sub>4</sub> -C <sub>3</sub>                  | 35.0                     | 116.0                      |                       |
| <b>Dihedral Angle</b>                                           | $K_\chi$<br>(kcal/mol)   | <b>n</b><br>(multiplicity) | $\delta$<br>(degrees) |
| F-C-C <sub>2</sub> -O                                           | 0.2                      | 3                          | 0                     |
| F-C-C <sub>2</sub> -C <sub>4</sub>                              | 0.2                      | 3                          | 0                     |
| C-C <sub>2</sub> -C <sub>4</sub> -C <sub>3</sub>                | 0.2                      | 3                          | 0                     |
| O-C <sub>2</sub> -C <sub>4</sub> -C <sub>3</sub>                | 0.065                    | 3                          | 180.0                 |
| O-C <sub>2</sub> -C <sub>4</sub> -H                             | 0.10                     | 3                          | 0                     |

**Table S3.** Heats of reaction computed at the B3LYP/6-311+g(d,p) level of theory and basis set for the interaction of the [hfac]<sup>-</sup> anion with CO<sub>2</sub>. (Note: To convert to kcal mol<sup>-1</sup>,  $\Delta G_{\text{rxn}} = (\Delta G_{\text{product}} - \Delta G_{\text{reactant}}) * 627.50$ )

|                        | <b>Reactant</b><br>[hfac] <sup>-</sup><br>(hartrees) | <b>Reactant</b><br>CO <sub>2</sub><br>(hartrees) | <b>Product</b><br>CO <sub>2</sub> ·[hfac] <sup>-</sup><br>(hartrees) | $\Delta G_{\text{rxn}}$<br>(kcal mol <sup>-1</sup> ) |
|------------------------|------------------------------------------------------|--------------------------------------------------|----------------------------------------------------------------------|------------------------------------------------------|
| <b>Configuration 1</b> | -940.76353545                                        | -188.59039262                                    | -1129.32586779                                                       | 17.61                                                |
| <b>Configuration 2</b> | -940.46353545                                        | -188.59039262                                    | -1129.32962642                                                       | 4.46                                                 |

This journal is © The Royal Society of Chemistry 2013

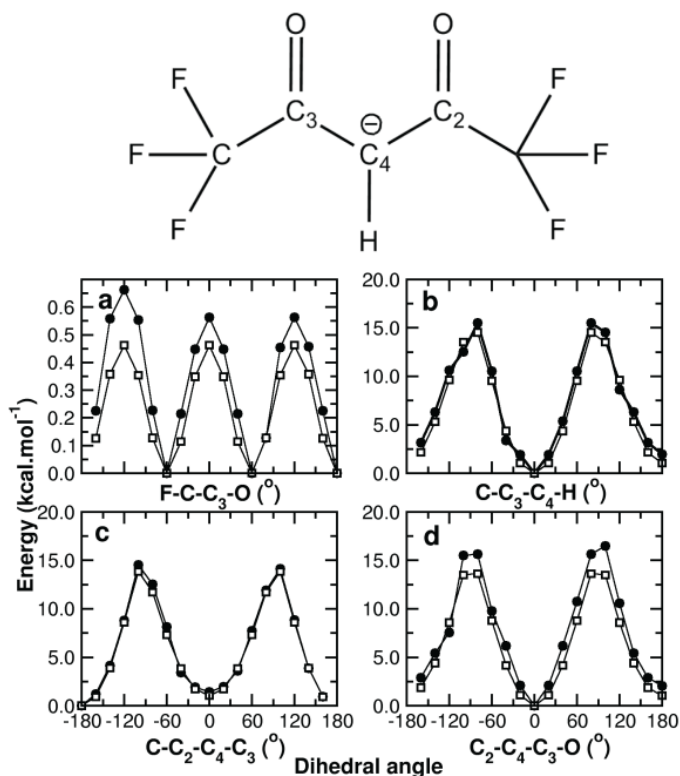

**Figure S1.** Chemical structure of [hfac]<sup>-</sup> anion is shown with the different atom names as a means for identifying the different dihedral angles present in the anion. Potential energy scans for the different governing dihedral angles in increments of 20° performed using Gaussian 09 at the HF/6-31+g(d,p) level of theory and basis set. Open squares represent force field predictions in comparison to the filled circles being representative of quantum mechanical energetics corresponding to different dihedral conformations.

## References

- [1] T. I. Morrow and E. J. Maginn, *Fluid Phase Equilib.* **2004**, *217*, 97–104.
- [2] M. J. Frisch, G. W. Trucks, H. B. Schlegel, G. E. Scuseria, M. A. Robb, J. R. Cheeseman, G. Scalmani, V. Barone, B. Mennucci, G. A. Petersson, H. Nakatsuji, M. Caricato, X. Li, H. P. Hratchian, A. F. Izmaylov, J. Bloino, G. Zheng, J. L. Sonnenberg, M. Hada, M. Ehara, K. Toyota, R. Fukuda, J. Hasegawa, M. Ishida, T. Nakajima, Y. Honda, O. Kitao, H. Nakai, T. Vreven, J. A. Montgomery, J. E. Peralta, F. Ogliaro, M. Bearpark, J. J. Heyd, E. Brothers, K. N. Kudin, V. N. Staroverov, R. Kobayashi, J. Normand, K. Raghavachari, A. Rendell, J. C. Burant, S. S. Iyengar, J. Tomasi, M. Cossi, N. Rega, J. M. Millam, M. Klene, J. E. Knox, J. B. Cross, V. Bakken, C. Adamo, J. Jaramillo, R. Gomperts, R. E. Stratmann, O. Yazyev, A. J. Austin, R. Cammi, C. Pomelli, J. W. Ochterski, R. L. Martin, K. Morokuma, V. G. Zakrzewski, G. A. Voth, P. Salvador, J. J. Dannenberg, S. Dapprich, A. D. Daniels, Farkas, J. B. Foresman, J. V. Ortiz, J. Cioslowski and D. J. Fox in *Gaussian 09, Revision B.01*, Vol. Wallingford CT, **2009**.
- [3] J. J. Potoff and J. I. Siepmann, *AIChE J.* **2001**, *47*, 1676–1682.
